# Supplementary material for: Effectiveness of an expanded role for community health workers on malaria blood examination rates in malaria elimination settings in Myanmar: an open stepped-wedge, cluster-randomised controlled trial
Source: PubMed Central journal article supplement (PMC11531616; doi:10.1016/j.lansea.2024.100499), 2024-10-17
Supplement: mmc5.pdf [file mmc5.pdf]

**CIME Referral Form**

Date .....

Name .....

Age ..... years

Gender .....

Address .....

Referred health centre .....

Reason for referral .....

Volunteer's

Signature .....

Name .....

Address .....

**(Receipt for volunteer)**

**CIME Referral Form**

Date .....

Name .....

Age ..... years

Gender .....

Address .....

Referred health centre .....

Reason for referral .....

Volunteer's

Signature .....

Name .....

Address .....

**(Receipt for referred health centre)**

**CIME Referral Form**

Date .....

Name .....

Age ..... years

Gender .....

Address .....

Name of the volunteer .....

Reason for referral .....

Diagnosis (To be filled by responsible health personnel) .....

.....

Health personnel's

Signature .....

Name .....

Designation .....

Facility .....

**(Receipt to send back to volunteer)**
